# Supplementary material for: Rate dependent neural responses of interaural-time-difference cues in fine-structure and envelope
Source: PeerJ. 2024 Apr 24;12:e17104. doi: 10.7717/peerj.17104 (PMC11055513; doi:10.7717/peerj.17104)
Supplement: Supplemental Information 2 [file peerj-12-17104-s002.xlsx]

## Sheet: ITDfs
p1	onf400	acc1f400	acc2f400	off400	onf800	acc1f800	acc2f800	off800	onf1200	acc1f1200	acc2f1200	off1200	onf1600	acc1f1600	acc2f1600	off1600
	-1.5249	1.5673	0.5075	0.0516	1.7714	1.1156	1.642	1.241	2.511	0.1387	0.321	1.7811	2.1045	4.4984	1.3694	0.1232
	1.5825	1.7485	1.524	0.3988	1.7536	2.7654	1.4441	0.034	2.2509	0.2505	0.9252	1.0987	3.2865	1.5032	1.9843	1.0674
	1.6693	2.2202	2.4705	0.0496	0.1034	1.2665	1.1248	1.3337	4.0838	2.7747	-0.392	-0.763	0.6524	-0.2952	0.6089	1.0224
	4.6951	1.138	0.7348	-1.2075	-0.3219	-0.9655	-0.2506	0.9225	2.3411	0.7517	2.6684	3.2248	1.3956	2.0542	-0.1675	0.0354
	2.6224	1.4309	0.7068	0.9003	1.8416	3.8605	0.6234	0.2367	1.2071	0.6097	3.3664	0.8499	1.1716	1.1866	1.1236	0.0788
	1.0936	0.8806	0.2432	-0.0245	0.6348	0.0361	0.238	-0.1094	1.4056	0.3368	1.1003	-0.3928	0.3875	0.6295	0.195	-0.9707
	1.2961	3.2531	2.8184	-1.3558	0.9566	2.3399	0.5656	-1.3223	1.6409	2.5521	0.8016	-1.7769	2.1844	0.7864	0.7842	-1.0512
	2.2041	2.1003	0.6469	1.7323	2.9163	1.7214	0.0644	0.0922	1.4354	0.6993	1.174	-0.71	2.5264	-0.006	1.1783	1.3302
n1
	-7.1658	-5.7181	-3.8443	-6.0047	-5.4085	-2.7649	-3.3609	-3.3308	-3.9379	-0.4645	-2.3004	-1.5957	-4.5136	1.7783	-1.1053	-1.2397
	-9.0923	-6.5153	-3.8095	-2.7976	-6.5147	-3.6201	-2.7777	-2.5211	-9.0695	-1.5133	-0.1393	-2.9732	-6.0578	0.0708	0.7137	-2.3726
	-2.597	-3.7021	-2.121	-2.2544	-2.2316	-0.5326	-2.9117	-1.2595	-3.3028	-2.2623	-2.2767	-3.2478	-2.3168	-1.3493	-1.7553	-1.4875
	-4.2913	-5.8538	-5.6889	-5.5048	-3.1607	-3.7324	-2.4852	-2.3418	-6.3971	-2.0442	-1.8389	-1.1007	-5.4813	0.2283	-1.0401	-3.0376
	-5.5261	-4.8198	-5.5707	-4.1796	-6.0803	-3.366	-3.9687	-3.8191	-7.5774	-1.7601	0.1627	-1.7078	-4.8985	-1.0429	-1.2247	-3.2592
	-2.5939	-3.1543	-2.143	-1.5571	-1.8649	-3.5356	-1.9512	-1.9237	-5.3265	-3.1644	-2.0408	-2.0506	-3.0782	0.1536	-0.2605	-1.6803
	-5.308	-5.1124	-3.8852	-3.0417	-1.3783	-3.8855	-3.5176	-3.8031	-3.8103	-2.9681	-1.781	-2.3458	-3.3295	-1.6088	-0.2328	-2.3314
	-3.5898	-4.3569	-2.2235	-1.247	-2.6896	-5.2232	-4.2935	-3.1424	-4.2255	-3.7899	-2.9607	-0.9576	-5.3665	-0.3905	-1.3007	-1.5687
p2
	5.3122	6.6698	4.2566	3.2449	5.174	5.8395	2.6862	2.4287	7.8338	3.4803	2.0077	2.3949	3.9495	2.173	1.5155	4.5749
	3.5112	2.0451	0.647	1.3849	4.9629	0.3009	1.1714	1.3715	3.0898	-0.9141	0.5212	1.9831	4.6178	0.845	0.7112	0.2857
	1.9877	2.0577	3.3653	1.2636	3.2082	3.0557	1.8987	1.4245	1.8088	0.9418	1.6664	1.4313	1.6881	-0.0622	1.4893	3.3944
	6.9638	2.2635	6.2014	4.2561	9.8983	5.5522	3.9466	3.9065	5.2899	3.6919	0.42	3.4858	6.3957	1.1573	-0.2368	4.0543
	3.5679	3.7289	3.7854	2.9669	4.0766	1.5191	1.9245	2.4377	5.6182	1.1362	1.2656	1.1876	3.7171	0.8818	1.7026	4.0354
	2.9124	3.1355	2.2847	1.8413	1.6573	2.2637	2.9167	2.2944	5.7849	1.0958	2.0996	3.4892	5.0832	1.1978	1.3355	2.0227
	3.0144	2.6553	0.2467	1.8521	1.2487	0.9082	0.6386	2.1715	2.3296	-0.2424	0.576	1.9636	1.0194	2.0008	0.7407	2.5273
	2.5122	4.7822	3.0662	1.1333	2.2141	2.82	3.0648	1.6462	3.9213	-0.2905	0.6258	2.5364	1.9153	1.4124	1.0432	1.1477
p2-n1
	12.4781	12.3879	8.1009	9.2497	10.5825	8.6043	6.0471	5.7596	11.7717	3.9448	4.3081	3.9906	8.463	0.3948	2.6209	5.8146
	12.6036	8.5604	4.4566	4.1825	11.4776	3.9209	3.949	3.8926	12.1593	0.5993	0.6605	4.9563	10.6756	0.7742	-0.0025	2.6583
	4.5847	5.7598	5.4863	3.5181	5.4398	3.5883	4.8105	2.6839	5.1116	3.2041	3.943	4.6791	4.0049	1.2871	3.2446	4.8819
	11.2551	8.1173	11.8904	9.7608	13.059	9.2846	6.4318	6.2483	11.687	5.7361	2.2589	4.5866	11.8771	0.9289	0.8033	7.0919
	9.0939	8.5487	9.3561	7.1465	10.1569	4.8851	5.8932	6.2568	13.1956	2.8963	1.1029	2.8953	8.6155	1.9247	2.9273	7.2946
	5.5064	6.2898	4.4277	3.3985	3.5222	5.7993	4.8679	4.218	11.1114	4.2602	4.1404	5.5399	8.1615	1.0442	1.596	3.7031
	8.3224	7.7677	4.1319	4.8938	2.627	4.7936	4.1562	5.9747	6.1399	2.7257	2.357	4.3094	4.3489	3.6096	0.9735	4.8587
	6.102	9.1391	5.2897	2.3803	4.9037	8.0432	7.3583	4.7886	8.1468	3.4994	3.5865	3.494	7.2818	1.8029	2.3439	2.7164
p1-n1
	5.6409	7.2855	4.3518	6.0563	7.1799	3.8805	5.0029	4.5718	6.4489	0.6032	2.6214	3.3768	6.6181	2.7201	2.4747	1.3629
	10.6748	8.2637	5.3335	3.1964	8.2683	6.3855	4.2217	2.5552	11.3205	1.7638	1.0645	4.072	9.3443	1.4324	1.2706	3.44
	4.2663	5.9223	4.5915	2.304	2.335	1.7992	4.0365	2.5931	7.3865	5.037	1.8846	2.4848	2.9692	1.054	2.3642	2.5098
	8.9864	6.9918	6.4237	4.2972	2.8388	2.7669	2.2346	3.2643	8.7382	2.7959	4.5073	4.3255	6.877	1.8258	0.8726	3.073
	8.1485	6.2506	6.2775	5.0799	7.9219	7.2265	4.5921	4.0558	8.7845	2.3698	3.2037	2.5577	6.0701	2.2295	2.3484	3.338
	3.6875	4.0349	2.3862	1.5327	2.4997	3.5717	2.1893	1.8142	6.7321	3.5012	3.141	1.6578	3.4657	0.4759	0.4555	0.7096
	6.6041	8.3655	6.7036	1.6859	2.3349	6.2253	4.0832	2.4809	5.4512	5.5202	2.5825	0.5689	5.5139	2.3952	1.017	1.2801
	5.794	6.4572	2.8704	2.9793	5.6059	6.9446	4.358	3.2346	5.6609	4.4892	4.1346	0.2475	7.8929	0.3844	2.479	2.8988
latency
p1
	54.7	12.8	39.5	10.05	42.2	26.15	84.35	10.05	61.25	49.4	58.9	31.1	48.15	68.1	52.45	32.4
	56.8	10.05	76.75	37.95	57.15	56.95	76.1	10.05	52.05	84.95	10.05	10.05	48.7	20.7	50.55	10.05
	53.35	70.7	78.45	12.05	21.95	66.7	64.8	57	44	10.05	10.05	12.05	51.9	18.5	10.05	10.05
	45.3	34.2	56.05	10.05	41	47.15	67.25	47.05	34.7	84.95	53.8	15.6	38.85	84.95	84.95	29.7
	10.05	34.3	84.95	30	39.6	57.7	18.9	46.4	10.05	10.05	68.65	32.3	47.85	65.55	14.5	36.1
	31.7	22.45	78.7	30.25	10.05	54.4	71.15	10.05	39.5	65.2	84.95	27.7	10.05	16.35	80.05	17.4
	71.1	51.55	25	10.05	72.1	57.75	15.8	10.05	10.05	10.05	20.3	10.05	76	56	56.6	51.1
	24.3	63.8	80.2	10.05	69.85	65.85	84.55	58.75	61.55	10.05	84.95	73	10.05	69.95	78.6	54.3
n1
	108.6	124.2	116.6	100.75	110.9	119.9	139.4	85.05	115.75	85.05	112.4	91.4	110.4	127.6	113.7	85.05
	121.75	128	127.45	88.8	122.2	129.3	142.15	85.7	123.75	159.95	105.05	103.55	117.15	137.55	159.95	129.95
	133.9	131.5	134	95.45	102.65	159.95	139.1	97.7	123.55	151.75	111.9	90.3	123.7	159.95	107.3	109.7
	100.15	98.25	112.4	92.4	88.15	102.55	125.25	94	101.45	132.65	154.1	87.25	99.85	159.95	133.9	91.05
	109.25	119.85	141.45	94.85	100.35	150.3	159.95	107.45	111.15	133.15	142.65	88.95	118.4	132.05	145.55	93
	101.7	111.35	126.3	85.05	96.8	114.7	122.85	85.05	101.8	126.15	158	85.05	110.15	128.15	130.75	85.05
	118.25	130.4	138	97.45	116.55	151.1	159.95	85.05	120.2	140.4	159.95	85.05	132.3	155.1	159.95	96.8
	117.75	123.05	144.05	103.9	125.15	137.15	152	109.35	123.3	142.5	159.95	103.15	128.4	126	152.05	119.3
p2
	188.1	205.95	224.15	209.3	214.35	197.5	212.2	176.85	205.2	299.95	299.95	198.85	213.25	160.05	288.45	182.6
	210.45	235.15	273.75	265.65	211.5	294.7	299.95	246.45	210.6	224.6	219.55	236.3	213.35	178.6	160.05	271.9
	205.75	195	205.95	299.95	221.15	238.4	240.15	162.9	207.7	281.2	253.15	281.7	222.3	214.8	267.05	197.15
	188.75	215.1	212.4	224.25	207.8	220.35	212.35	235.85	230.05	244.5	299.95	183.05	222.8	262.15	243.65	241.85
	180.95	203.55	213.8	179.05	196.6	235.75	244.5	221.35	206.4	232.35	233.85	224.2	193	190.35	212.2	197.55
	171.2	180.25	186.4	173.05	169.2	182.5	193.65	186.85	176.9	194.25	212.2	179.95	181.35	188.45	286.05	193.8
	229.8	202.85	265.4	162.7	234.15	299.95	299.95	191.3	207.65	235.05	228.6	178.05	256.95	299.95	249.5	270.15
	247.8	217.9	232.65	179.2	251	245.3	235.95	242.65	208.45	205.7	238.45	245.15	258.85	237.8	218.8	178.5
p2-n1
	79.5	81.75	107.55	108.55	103.45	77.6	72.8	91.8	89.45	214.9	187.55	107.45	102.85	32.45	174.75	97.55
	88.7	107.15	146.3	176.85	89.3	165.4	157.8	160.75	86.85	64.65	114.5	132.75	96.2	41.05	0.1	141.95
	71.85	63.5	71.95	204.5	118.5	78.45	101.05	65.2	84.15	129.45	141.25	191.4	98.6	54.85	159.75	87.45
	88.6	116.85	100	131.85	119.65	117.8	87.1	141.85	128.6	111.85	145.85	95.8	122.95	102.2	109.75	150.8
	71.7	83.7	72.35	84.2	96.25	85.45	84.55	113.9	95.25	99.2	91.2	135.25	74.6	58.3	66.65	104.55
	69.5	68.9	60.1	88	72.4	67.8	70.8	101.8	75.1	68.1	54.2	94.9	71.2	60.3	155.3	108.75
	111.55	72.45	127.4	65.25	117.6	148.85	140	106.25	87.45	94.65	68.65	93	124.65	144.85	89.55	173.35
	130.05	94.85	88.6	75.3	125.85	108.15	83.95	133.3	85.15	63.2	78.5	142	130.45	111.8	66.75	59.2
p1-n1
	53.9	111.4	77.1	90.7	68.7	93.75	55.05	75	54.5	35.65	53.5	60.3	62.25	59.5	61.25	52.65
	64.95	117.95	50.7	50.85	65.05	72.35	66.05	75.65	71.7	75	95	93.5	68.45	116.85	109.4	119.9
	80.55	60.8	55.55	83.4	80.7	93.25	74.3	40.7	79.55	141.7	101.85	78.25	71.8	141.45	97.25	99.65
	54.85	64.05	56.35	82.35	47.15	55.4	58	46.95	66.75	47.7	100.3	71.65	61	75	48.95	61.35
	99.2	85.55	56.5	64.85	60.75	92.6	141.05	61.05	101.1	123.1	74	56.65	70.55	66.5	131.05	56.9
	70	88.9	47.6	54.8	86.75	60.3	51.7	75	62.3	60.95	73.05	57.35	100.1	111.8	50.7	67.65
	47.15	78.85	113	87.4	44.45	93.35	144.15	75	110.15	130.35	139.65	75	56.3	99.1	103.35	45.7
	93.45	59.25	63.85	93.85	55.3	71.3	67.45	50.6	61.75	132.45	75	30.15	118.35	56.05	73.45	65
because the peakpicking windows were [0.03 0.09; 0.075 0.15; 0.15 0.29] at the very beginning, because of the overlap of P1 and N1 time window, it could cause shorter N1 latency than P1 latency in the EEGdata2
this data was sorted according to the time of P1, N1,P2
for both the latency of amplitude
which is the EEGdata2_sorted
It was changed again to unsorted version, but with window values of [0.01 0.085; 0.085 0.16; 0.16 0.3]; the data was saved to EEGdata3, and the statistic anlysis was redone

## Sheet: ITDenv SAM
p1	onf40	acc1f40	acc2f40	off40	onf80	acc1f80	acc2f80	off80	onf160	acc1f160	acc2f160	off160	onf320	acc1f320	acc2f320	off320
	2.9463	-0.628	2.1306	-0.1772	0.3982	0.4837	1.6492	0.1429	-0.4356	2.5321	1.4099	-0.8355	-0.4023	-0.6167	2.5673	-1.1379
	1.4196	1.9496	0.4781	-0.5318	1.099	0.39	1.7346	0.3859	1.2107	1.2931	1.3347	0.7692	2.7325	1.2808	2.063	0.2093
	-0.4534	1.2267	0.3708	1.8161	0.9075	0.6521	0.796	1.3128	1.096	0.8396	-0.95	0.2623	0.529	0.2378	2.3237	1.2979
	4.0906	-0.2104	0.7665	2.5085	1.371	0.1053	0.458	2.565	-0.2834	-1.0083	0.9887	0.1851	0.1513	-0.7208	-0.1771	1.9581
	-0.4822	1.2759	1.1745	0.1603	2.8922	-0.4821	0.7676	0.3746	-0.5281	0.241	-0.1586	0.9252	4.7535	1.7281	0.8363	2.3645
	0.765	-0.62	0.5949	-0.2841	-0.0042	0.4473	0.6048	1.74	0.1577	-0.1868	0.5138	-0.4875	1.593	-1.1949	0.0986	0.2103
	-0.0711	0.6516	-0.4197	-0.2871	2.8894	0.8653	0.3686	0.2492	1.3585	0.4749	1.5763	0.5927	0.7611	1.8305	0.5316	-0.5616
	0.4422	1.2405	0.9579	2.4783	3.4032	2.7553	0.8676	-0.2885	2.8607	0.6141	1.57	-0.5531	3.5451	1.2829	1.7095	-0.5401
n1
	-3.0324	-0.6196	0.8814	-4.3202	-4.319	-2.4833	-1.9904	-3.3529	-6.5265	-0.6933	1.2809	-0.8266	-3.7939	-0.6126	-1.7882	-4.4878
	-6.0632	0.7437	-0.5932	-2.2209	-6.7376	0.3956	-0.482	-2.9139	-8.2613	0.2849	-1.4406	-5.462	-6.8377	0.5118	-1.5903	-2.4764
	-3.7365	-0.4675	-0.9715	-1.485	-1.0376	0.6386	0.7225	-0.4207	-2.6641	0.0912	-1.7292	-2.1485	-2.6883	-0.5541	0.061	-1.3702
	-4.4756	-3.4727	-2.017	-8.3749	-6.5954	0.1145	-1.1162	-7.6057	-8.1926	-1.4059	-0.0316	-6.4915	-8.2097	-2.9566	-2.4293	-4.7726
	-2.1151	-0.4062	0.7207	-3.2979	-3.8773	-0.7473	0.2541	-1.4156	-5.9309	0.247	-1.2446	-2.8846	-6.1199	-1.8054	-1.4353	-2.4683
	-3.5927	-0.9212	-0.2178	-1.3111	-2.3421	-0.4743	0.6081	-2.5214	-6.6445	-1.2803	-0.399	-1.5557	-7.5001	-1.197	-1.3327	-1.6215
	-3.2519	0.0415	-0.9042	-1.528	-2.4273	-1.0362	-0.8987	-2.1217	-4.527	-0.5746	0.6936	-0.4163	-2.475	-0.8056	-1.6126	-0.9326
	-2.2804	0.0371	0.0321	-1.4109	0.4349	0.3108	0.1661	-3.217	-2.4241	-1.4597	1.4388	-3.4046	-2.6821	-1.0336	0.2245	-4.0311
p2
	5.3132	2.4923	1.857	2.792	4.7841	0.0692	0.027	3.5371	3.6139	2.3921	1.9736	3.735	6.459	2.9936	-0.0507	5.668
	1.7486	2.0749	0.6785	1.2813	4.3077	1.1238	-0.1493	1.6534	4.0343	1.1932	1.7689	2.3838	3.9878	1.4644	0.9376	1.0163
	2.1096	0.7921	0.4783	1.6367	2.8991	2.0882	1.2865	1.9905	3.4543	1.0707	0.9979	1.5729	5.077	0.7556	0.6322	2.5639
	4.5785	6.2635	4.3698	4.6088	5.0602	3.141	2.8977	7.8637	8.3829	2.5296	0.6132	11.4242	7.4032	4.0144	1.8276	7.2327
	1.6893	1.9567	2.0297	3.3195	2.7863	2.3289	1.6579	4.0021	4.3807	2.0664	1.1327	2.3471	2.6034	2.4831	1.8226	2.7711
	4.1929	3.1764	1.0844	4.0533	4.8832	1.7815	2.8175	4.1106	10.0438	2.4	0.8975	5.1074	8.6663	1.4984	1.8844	5.0793
	1.7148	1.019	0.5353	1.8086	0.6196	0.5661	1.2354	1.6018	1.0769	-0.408	0.879	1.5324	2.2917	0.6345	0.8168	2.9758
	2.425	0.2884	0.7642	2.2119	3.1162	0.8033	1.2106	2.7007	4.6886	1.2936	2.1358	2.9452	4.1817	3.4253	1.0913	6.26
p2-n1
	8.3456	3.1119	0.9756	7.1122	9.1031	2.5524	2.0175	6.89	10.1404	3.0853	0.6926	4.5615	10.2529	3.6062	1.7374	10.1559
	7.8118	1.3312	1.2717	3.5022	11.0454	0.7282	0.3327	4.5673	12.2956	0.9083	3.2095	7.8458	10.8256	0.9527	2.5279	3.4927
	5.8461	1.2597	1.4498	3.1217	3.9367	1.4496	0.564	2.4113	6.1183	0.9794	2.7271	3.7214	7.7653	1.3096	0.5712	3.9341
	9.0542	9.7362	6.3867	12.9838	11.6556	3.0264	4.0139	15.4694	16.5755	3.9355	0.6449	17.9157	15.6129	6.971	4.2569	12.0053
	3.8044	2.3628	1.309	6.6174	6.6636	3.0763	1.4038	5.4177	10.3117	1.8195	2.3773	5.2317	8.7233	4.2884	3.2579	5.2394
	7.7856	4.0976	1.3022	5.3644	7.2254	2.2557	2.2094	6.632	16.6883	3.6803	1.2965	6.6631	16.1663	2.6954	3.217	6.7008
	4.9667	0.9775	1.4395	3.3366	3.0469	1.6023	2.1342	3.7236	5.6039	0.1666	0.1855	1.9487	4.7667	1.4401	2.4294	3.9084
	4.7054	0.2513	0.7321	3.6228	2.6814	0.4926	1.0445	5.9177	7.1127	2.7534	0.697	6.3498	6.8638	4.4589	0.8668	10.2912
p1-n1
	5.9787	-0.0084	1.2492	4.143	4.7172	2.9669	3.6396	3.4958	6.0909	3.2254	0.1289	-0.009	3.3916	-0.0041	4.3555	3.3499
	7.4828	1.206	1.0713	1.6892	7.8366	-0.0056	2.2166	3.2998	9.472	1.0082	2.7753	6.2312	9.5702	0.769	3.6533	2.6858
	3.2831	1.6943	1.3423	3.301	1.9451	0.0135	0.0735	1.7335	3.76	0.7483	0.7791	2.4107	3.2173	0.7918	2.2627	2.668
	8.5662	3.2623	2.7835	10.8834	7.9664	-0.0093	1.5741	10.1707	7.9092	0.3976	1.0204	6.6766	8.361	2.2359	2.2522	6.7307
	1.6328	1.6821	0.4538	3.4582	6.7695	0.2652	0.5135	1.7902	5.4029	-0.006	1.086	3.8098	10.8735	3.5335	2.2715	4.8327
	4.3577	0.3012	0.8127	1.027	2.3379	0.9215	-0.0033	4.2614	6.8022	1.0934	0.9128	1.0682	9.093	0.0021	1.4313	1.8317
	3.1809	0.6101	0.4846	1.2409	5.3167	1.9015	1.2673	2.3709	5.8855	1.0495	0.8827	1.009	3.2361	2.6361	2.1442	0.371
	2.7226	1.2034	0.9257	3.8892	2.9683	2.4445	0.7015	2.9285	5.2848	2.0738	0.1312	2.8514	6.2272	2.3165	1.485	3.4911
latency
p1
	32.45	84.95	84.95	46.15	38	53.7	10.05	40.65	25	22.1	76.2	84.95	54.35	84.95	25.8	47.15
	10.05	51.8	84.95	45.3	54.05	84.95	38.6	10.05	50.55	43.8	10.05	26.5	36.5	84.95	21.85	10.05
	44.75	84.95	10.05	38.55	18.5	84.95	67.3	49.2	19.95	57.5	56.3	45.4	63.9	52.9	47.05	56.4
	35.35	25.4	28.05	47.2	10.05	84.95	40.7	43.75	23.3	10.05	81.1	47.2	10.05	10.05	10.05	43.45
	57.95	18.85	53.05	38.35	10.05	61.9	78.3	32.1	54.7	84.95	32.75	34.95	10.05	84.95	70.85	10.05
	10.05	21.75	46.15	31.15	16.5	76.35	84.95	18.25	39.8	10.05	23.2	29.25	33.9	79.35	10.05	10.05
	10.05	17.65	10.05	27.3	66.05	14.9	10.05	31.65	64.55	29.2	84.95	10.05	38.75	78.35	10.05	78.55
	60.2	10.05	50.45	23.25	70.35	84.95	10.05	51.8	45.8	48.85	84.95	10.05	53.1	11.5	24.25	10.05
n1
	99.25	85.05	148.35	97.8	98.15	116.95	112.45	94	105.85	101.2	95.7	85.05	99.7	85.05	85.05	95.4
	113.15	100.95	125.4	109.05	114.6	85.05	125.85	85.05	117.3	105.75	87.1	87.35	110.75	149.1	85.05	126.25
	104.35	158.95	159.95	100.45	93.8	139	87.25	93.5	121.65	100.55	93	97.95	114.5	85.05	140.4	98.3
	88.65	85.05	85.05	112.55	85.05	85.05	85.05	106.05	85.05	85.05	108.2	109.45	85.6	85.05	85.05	119.4
	95.6	144.4	87.4	104.85	106.45	85.05	103.85	91.05	108.95	85.05	86.5	113.35	110.7	159.95	134.95	95.15
	101.15	85.05	117.55	108.85	94.75	119.25	85.05	104.4	102.45	91.85	85.05	97.25	103.3	85.05	85.05	85.05
	97	101.65	101.25	119.3	138.7	143.2	102.9	114.65	128.3	110.55	159.95	85.05	124.7	137.95	155.2	111
	106.85	85.05	93.7	93.45	129.1	136.45	92.3	103.35	119.55	132.65	125.75	98.25	111.25	145	85.05	100.55
p2
	205.4	160.05	180.8	177.75	229.6	299.95	264.65	182.4	206.75	164.65	160.05	169.5	208.95	273.35	299.95	186.4
	181.35	160.05	165.9	231.75	197.6	172.9	210.1	196.1	205.35	160.05	248.2	233.05	205.2	184.6	193.5	265
	192.55	211.55	292.75	227.25	221.55	194.1	160.05	171.2	194.35	208.65	164.4	185.3	201.35	268.3	186.6	160.05
	199.25	278	160.35	203.15	215.2	160.05	160.05	218.2	207.55	256.3	161.75	211.45	206	238.3	242.8	228.05
	174.3	287.4	185.65	206.15	189.95	200.5	160.5	188.8	188.35	160.05	275.05	169.85	177.85	290.75	299.95	186.55
	177.85	171.95	176.65	167.5	173.25	170.75	166.65	171.6	182.8	160.05	160.05	171.55	172.25	169.3	160.05	167
	208.85	160.05	299.95	222.3	200.7	251.1	166.9	189.15	299.95	160.05	259.4	203.05	198.15	174.2	299.95	296.4
	181.95	290.15	299.95	160.7	197.7	299.95	163.4	239.35	198.55	194.5	180.75	250.85	211.55	276.85	169.1	275.3
p2-n1
	106.15	75	32.45	79.95	131.45	183	152.2	88.4	100.9	63.45	64.35	84.45	109.25	188.3	214.9	91
	68.2	59.1	40.5	122.7	83	87.85	84.25	111.05	88.05	54.3	161.1	145.7	94.45	35.5	108.45	138.75
	88.2	52.6	132.8	126.8	127.75	55.1	72.8	77.7	72.7	108.1	71.4	87.35	86.85	183.25	46.2	61.75
	110.6	192.95	75.3	90.6	130.15	75	75	112.15	122.5	171.25	53.55	102	120.4	153.25	157.75	108.65
	78.7	143	98.25	101.3	83.5	115.45	56.65	97.75	79.4	75	188.55	56.5	67.15	130.8	165	91.4
	76.7	86.9	59.1	58.65	78.5	51.5	81.6	67.2	80.35	68.2	75	74.3	68.95	84.25	75	81.95
	111.85	58.4	198.7	103	62	107.9	64	74.5	171.65	49.5	99.45	118	73.45	36.25	144.75	185.4
	75.1	205.1	206.25	67.25	68.6	163.5	71.1	136	79	61.85	55	152.6	100.3	131.85	84.05	174.75
p1-n1
	66.8	0.1	63.4	51.65	60.15	63.25	102.4	53.35	80.85	79.1	19.5	0.1	45.35	0.1	59.25	48.25
	103.1	49.15	40.45	63.75	60.55	0.1	87.25	75	66.75	61.95	77.05	60.85	74.25	64.15	63.2	116.2
	59.6	74	149.9	61.9	75.3	54.05	19.95	44.3	101.7	43.05	36.7	52.55	50.6	32.15	93.35	41.9
	53.3	59.65	57	65.35	75	0.1	44.35	62.3	61.75	75	27.1	62.25	75.55	75	75	75.95
	37.65	125.55	34.35	66.5	96.4	23.15	25.55	58.95	54.25	0.1	53.75	78.4	100.65	75	64.1	85.1
	91.1	63.3	71.4	77.7	78.25	42.9	0.1	86.15	62.65	81.8	61.85	68	69.4	5.7	75	75
	86.95	84	91.2	92	72.65	128.3	92.85	83	63.75	81.35	75	75	85.95	59.6	145.15	32.45
	46.65	75	43.25	70.2	58.75	51.5	82.25	51.55	73.75	83.8	40.8	88.2	58.15	133.5	60.8	90.5

## Sheet: filtered clicks
p1	onf40	acc1f40	off40	onf80	acc1f80	off80	onf160	acc1f160	off160	onf320	acc1f320	off320
	2.4423	2.2446	4.2807	1.1088	3.3045	1.2383	0.0919	0.7425	0.7396	0.1401	0.1587	0.7541
	0.6616	1.3914	1.0826	0.7098	1.1351	0.267	1.1716	1.1533	0.3741	2.4294	0.4131	-0.3976
	1.331	2.0442	-0.6147	0.6504	0.8029	-0.402	-0.2235	0.8638	-0.1563	0.4795	0.9045	0.5204
	3.2235	3.1208	1.4814	2.0246	-0.543	-0.3757	1.0323	-0.2227	4.3902	3.5541	2.8529	1.3973
	1.5628	-0.0502	2.1291	3.2083	0.8303	2.5909	2.3421	1.4375	0.3431	2.616	0.1547	1.5033
	0.6935	1.5927	-0.8789	2.2847	1.8318	-1.5766	3.0685	0.5995	-1.9758	1.1898	0.2325	-0.2042
	2.2748	1.3581	1.8209	2.733	-0.5262	0.4235	1.3774	0.1587	0.6994	1.8669	1.0943	0.2211
	3.5212	1.5922	-0.6729	3.4686	1.5395	0.7802	3.2149	3.1321	0.3792	1.9509	2.4311	-0.0287
n1
	-1.4026	-4.0139	-1.5637	-1.9409	-4.021	-3.9894	-2.7909	-1.244	-3.4487	-2.7975	-1.7704	-4.6278
	-1.418	-0.8216	-1.3854	-2.9192	-1.3627	-1.2204	-5.1457	-1.5225	-2.3429	-7.1764	-1.0246	-1.9276
	-0.3241	-0.6088	-2.1021	-2.2925	-0.1233	-1.63	-2.3511	-1.711	-2.4857	-3.543	-0.315	-1.6264
	-0.4969	-0.7779	0.3798	-3.3254	-3.3442	-0.7778	-4.5213	-3.3	-7.1694	-7.1968	1.3066	-4.476
	-0.4721	-1.0905	-1.5819	-4.1281	-0.1991	-2.7062	-3.3992	-2.1429	-2.9768	-4.337	-0.5678	-2.9201
	0.2258	-1.8317	-0.8781	-1.0953	1.2899	-2.0934	-3.7588	-0.5651	-2.6168	-4.2234	-1.224	-2.3265
	-1.061	0.5583	-1.0191	-1.6176	-0.5184	-1.517	-3.389	-0.8146	-3.8675	-3.2635	-0.2292	-2.2808
	0.8255	-0.6434	-2.8323	0.4566	-3.7422	0.4774	-2.4018	-2.537	-2.0134	-4.0071	-5.5224	-0.4549
p2
	0.2446	-0.3425	-0.3889	2.4259	-0.6383	0.976	5.949	4.7712	0.0574	3.6068	3.1287	2.2309
	1.9093	-0.4251	1.3066	3.6549	1.2588	1.3465	3.609	0.8736	2.005	2.9205	1.6044	0.8413
	1.3277	0.4869	0.6679	0.6189	0.9793	1.0893	1.8365	0.5241	2.0336	1.9495	1.9952	1.7675
	2.7876	-0.5287	4.5313	2.0348	0.9028	3.45	9.0538	-1.1782	2.6034	3.7285	2.2406	4.2854
	2.2174	0.9665	-1.0993	1.2457	1.7839	1.4892	4.037	0.3089	2.4282	4.4736	1.5127	1.8634
	4.7854	1.5902	2.5524	2.6283	1.2846	4.4777	4.1697	1.7205	5.0033	4.6294	0.9532	2.1311
	0.9561	0.7533	0.5907	-0.0426	0.7516	2.2209	2.8364	0.7673	1.8195	1.5905	0.1128	3.6809
	1.2921	1.4468	3.4611	0.4551	2.4378	3.227	2.3866	0.4958	1.9108	4.6877	3.6747	2.3088
p2-n1
	1.6472	3.6714	1.1747	4.3668	3.3827	4.9654	8.7399	6.0152	3.5061	6.4043	4.8991	6.8587
	3.3273	0.3965	2.692	6.5742	2.6215	2.5668	8.7548	2.3961	4.3479	10.0969	2.6289	2.7689
	1.6518	1.0956	2.77	2.9114	1.1026	2.7193	4.1876	2.2351	4.5193	5.4925	2.3103	3.3939
	3.2845	0.2492	4.1514	5.3602	4.247	4.2278	13.5752	2.1218	9.7728	10.9253	0.934	8.7614
	2.6895	2.057	0.4826	5.3738	1.983	4.1955	7.4363	2.4518	5.405	8.8106	2.0805	4.7835
	4.5596	3.4219	3.4305	3.7236	-0.0053	6.5711	7.9285	2.2857	7.62	8.8527	2.1772	4.4576
	2.0171	0.195	1.6098	1.575	1.27	3.7379	6.2254	1.5819	5.6871	4.854	0.342	5.9616
	0.4666	2.0902	6.2935	-0.0015	6.18	2.7496	4.7884	3.0328	3.9241	8.6948	9.1971	2.7637
p1-n1
	3.8449	6.2586	5.8444	3.0497	7.3255	5.2277	2.8827	1.9865	4.1883	2.9376	1.9291	5.3819
	2.0796	2.2131	2.468	3.6291	2.4978	1.4873	6.3174	2.6758	2.7171	9.6058	1.4377	1.53
	1.655	2.653	1.4874	2.9428	0.9262	1.228	2.1276	2.5749	2.3293	4.0224	1.2195	2.1468
	3.7204	3.8987	1.1016	5.3499	2.8012	0.4021	5.5537	3.0773	11.5596	10.7508	1.5463	5.8733
	2.0349	1.0403	3.711	7.3364	1.0294	5.2971	5.7414	3.5803	3.3199	6.953	0.7225	4.4234
	0.4678	3.4243	-0.0009	3.3799	0.5418	0.5168	6.8273	1.1647	0.6409	5.4132	1.4564	2.1222
	3.3358	0.7998	2.84	4.3506	-0.0078	1.9406	4.7664	0.9733	4.5669	5.1304	1.3235	2.5019
	2.6958	2.2356	2.1594	3.012	5.2817	0.3028	5.6167	5.6691	2.3925	5.9581	7.9535	0.4262
latency
p1
	58.65	16.45	62.25	75.15	10.05	53.4	50.2	84.95	40.3	61.1	31.85	47.15
	13.75	52.85	84.95	59.85	16.3	65.35	61.15	39.85	10.05	56.35	84.95	23.85
	56.95	57.75	74.3	10.05	72.9	47.35	64.45	32.65	20.8	15.1	74.35	22.2
	10.05	58.3	84.95	52.3	10.05	54.45	30.5	84.95	10.05	49.25	47.9	37.9
	84.95	84.95	77.45	10.05	14.85	61.65	37.25	10.05	54.65	50.55	10.05	36.3
	67.55	35.35	84.95	24.55	75.25	78.4	65.7	66.1	50.2	23	24.95	43.1
	84.15	84.95	80.3	84.95	84.95	78.45	79.4	33.5	27.65	72.2	41.75	12.05
	84.95	68.35	10.05	75.25	51	84.95	58.3	69.7	55.1	73.3	65.45	39.9
n1
	143.1	116.75	140.65	127.15	159.95	121.75	107.6	126.6	111.55	127.65	85.05	110.6
	153.3	159.95	138.9	152.55	156.15	136.6	126.95	159.95	131.1	119.55	159.95	152.25
	134.75	159.95	158.95	149.45	107.3	123.2	116.45	87.95	91.85	130.85	114.2	122.05
	159.95	140.85	159.95	130.15	106.45	103.75	89	159.95	99.4	103.3	90.6	96.9
	142.4	132.85	159.95	131.85	159.95	128.25	116.45	159.95	124.15	108.5	139.9	109.15
	109.55	115.45	85.05	128.9	159.95	117.5	118.2	110.5	87.25	108.1	85.05	111.35
	157.95	136.55	159.95	159.95	85.05	118.75	137.75	85.05	112.7	134.05	87.35	92.5
	159.95	159.95	88.35	159.95	152.7	138.85	131.35	139.55	118.9	123.1	131.15	85.05
p2
	194.8	247.25	174.25	233.15	299.95	223.45	221.2	201.35	294.3	205.4	198.7	264.2
	285.5	220	243	235	209.15	213.4	222	219.1	259.25	202.85	293.55	211.45
	205.2	299.95	299.95	218.25	255.45	210.25	188.8	160.05	194.95	204.85	256.5	192.5
	264.15	186.05	220.75	208	247.6	238.4	217.95	244.45	245.9	171.65	160.05	206.45
	198.5	289.45	299.95	184.9	253.5	190.7	191.65	299.95	198.1	170.55	296.85	279.3
	182.15	268.55	239.1	192.75	160.05	299.95	180.1	268.95	299.95	166.8	293.2	299.95
	232.6	160.05	212.6	239.5	299.95	195.3	208	285.15	174.55	200.4	299.95	285.85
	241.35	238.1	183.6	160.05	212.35	196.3	203.25	228.45	187.8	224.8	229.8	195.45
p2-n1
	51.7	130.5	33.6	106	140	101.7	113.6	74.75	182.75	77.75	113.65	153.6
	132.2	60.05	104.1	82.45	53	76.8	95.05	59.15	128.15	83.3	133.6	59.2
	70.45	140	141	68.8	148.15	87.05	72.35	72.1	103.1	74	142.3	70.45
	104.2	45.2	60.8	77.85	141.15	134.65	128.95	84.5	146.5	68.35	69.45	109.55
	56.1	156.6	140	53.05	93.55	62.45	75.2	140	73.95	62.05	156.95	170.15
	72.6	153.1	154.05	63.85	0.1	182.45	61.9	158.45	212.7	58.7	208.15	188.6
	74.65	23.5	52.65	79.55	214.9	76.55	70.25	200.1	61.85	66.35	212.6	193.35
	81.4	78.15	95.25	0.1	59.65	57.45	71.9	88.9	68.9	101.7	98.65	110.4
p1-n1
	84.45	100.3	78.4	52	149.9	68.35	57.4	41.65	71.25	66.55	53.2	63.45
	139.55	107.1	53.95	92.7	139.85	71.25	65.8	120.1	121.05	63.2	75	128.4
	77.8	102.2	84.65	139.4	34.4	75.85	52	55.3	71.05	115.75	39.85	99.85
	149.9	82.55	75	77.85	96.4	49.3	58.5	75	89.35	54.05	42.7	59
	57.45	47.9	82.5	121.8	145.1	66.6	79.2	149.9	69.5	57.95	129.85	72.85
	42	80.1	0.1	104.35	84.7	39.1	52.5	44.4	37.05	85.1	60.1	68.25
	73.8	51.6	79.65	75	0.1	40.3	58.35	51.55	85.05	61.85	45.6	80.45
	75	91.6	78.3	84.7	101.7	53.9	73.05	69.85	63.8	49.8	65.7	45.15

## Sheet: ASSR
experiment 1
T1-T4	400	800	1200	1600			400		T1	T2	T3	T4	800		T1	T2	T3	T4	1200		T1	T2	T3	T4	1600		T1	T2	T3	T4
1	0.1229	0.1429	0.0991	0.0846				1	0.1721	0.173	0.1727	0.0392		1	0.2036	0.187	0.1911	0.0459		1	0.1176	0.1611	0.1192	0.0548		1	0.1142	0.1276	0.124	0.0244
3	0.1449	0.1226	0.1016	0.0871				3	0.203	0.1678	0.2134	0.0257		3	0.1503	0.1836	0.16	0.0342		3	0.1142	0.1541	0.1522	0.0187		3	0.1349	0.1274	0.1257	0.0425
4	0.1386	0.1522	0.12	0.1127				4	0.1558	0.2026	0.1783	0.0329		4	0.1766	0.2257	0.2064	0.0354		4	0.1525	0.1468	0.176	0.037		4	0.1696	0.1613	0.1276	0.0234
5	0.3149	0.2417	0.2107	0.1546				5	0.4425	0.3825	0.453	0.0359		5	0.3198	0.3655	0.3114	0.0366		5	0.3059	0.2874	0.2833	0.0335		5	0.2429	0.2245	0.1933	0.0332
7	0.2147	0.1916	0.156	0.1442				7	0.2632	0.2913	0.2885	0.0534		7	0.2409	0.2826	0.2547	0.043		7	0.2172	0.2455	0.1846	0.0481		7	0.2145	0.2095	0.1972	0.0642
8	0.1574	0.1086	0.1444	0.1186				8	0.2096	0.1985	0.2383	0.0178		8	0.1289	0.1569	0.1551	0.0199		8	0.1788	0.2204	0.1955	0.0312		8	0.1575	0.1818	0.1535	0.0342
9	0.0767	0.1391	0.1042	0.0987				9	0.1108	0.1174	0.0759	0.0339		9	0.1858	0.2071	0.1858	0.0406		9	0.1432	0.1381	0.1501	0.0313		9	0.1063	0.157	0.1548	0.0364
11	0.2557	0.2068	0.1998	0.2332				11	0.3679	0.3065	0.3945	0.0236		11	0.286	0.2833	0.2888	0.0292		11	0.2878	0.2486	0.2801	0.0378		11	0.3107	0.3524	0.3029	0.0237
mean	0.178225	0.163188	0.141975	0.129213
experiment 2
T1-T4	40	80	160	320			40		T1	T2	T3	T4	80		T1	T2	T3	T4	160		T1	T2	T3	T4	320		T1	T2	T3	T4
1	0.068	0.0223	0.0523	0.0154				1	0.0989	0.0969	0.098	0.0323		1	0.0457	0.0496	0.0527	0.0267		1	0.0684	0.0521	0.0812	0.0686		1	0.0258	0.0249	0.0308	0.026
3	0.0454	0.0594	0.0634	0.0225				3	0.0749	0.0533	0.0575	0.037		3	0.0908	0.0945	0.0993	0.032		3	0.0853	0.0718	0.0694	0.0337		3	0.0331	0.0372	0.0241	0.0224
4	0.0587	0.0446	0.0515	0.0123				4	0.0913	0.0947	0.0696	0.0175		4	0.0646	0.0505	0.0673	0.0451		4	0.0927	0.0652	0.0633	0.029		4	0.0176	0.0144	0.0159	0.0193
5	0.1003	0.0473	0.0678	0.0169				5	0.1369	0.1483	0.0992	0.0466		5	0.0911	0.0609	0.056	0.0532		5	0.0963	0.0937	0.0986	0.0347		5	0.0275	0.0145	0.0229	0.0129
7	0.1247	0.0805	0.0708	0.0264				7	0.186	0.1744	0.1756	0.0384		7	0.1363	0.1154	0.1165	0.055		7	0.1329	0.0639	0.1197	0.0583		7	0.0336	0.0296	0.0386	0.0155
8	0.0646	0.0275	0.0845	0.023				8	0.096	0.0823	0.0891	0.0475		8	0.0413	0.0608	0.0481	0.0489		8	0.1014	0.117	0.1195	0.0376		8	0.0362	0.032	0.0326	0.0199
9	0.0697	0.0295	0.0466	0.0165				9	0.1001	0.0997	0.1006	0.0362		9	0.047	0.0549	0.0308	0.0235		9	0.0781	0.0485	0.0656	0.0287		9	0.0229	0.016	0.0247	0.0144
11	0.1325	0.0405	0.0567	0.0131				11	0.1721	0.1888	0.2055	0.0272		11	0.0845	0.0607	0.0497	0.0279		11	0.0871	0.079	0.0759	0.0294		11	0.023	0.0144	0.0147	0.0109
experiment 3
T1 T2 T4	40	80	160	320			40		T1	T2	T4		80		T1	T2	T4		160		T1	T2	T4		320		T1	T2	T4
1	0.0754	0.0281	0.0601	0.024				1	0.1512	0.1151	0.0449			1	0.0523	0.0534	0.0542			1	0.0845	0.0915	0.0321			1	0.0454	0.0269	0.019
3	0.0634	0.0659	0.1067	0.05				3	0.1197	0.0911	0.0426			3	0.1088	0.096	0.0268			3	0.1623	0.1409	0.0351			3	0.0719	0.0831	0.0121
4	0.0993	0.0451	0.1458	0.0426				4	0.1841	0.1552	0.027			4	0.0799	0.0838	0.04			4	0.1988	0.2075	0.0332			4	0.064	0.0572	0.0143
5	0.1491	0.0597	0.1161	0.0383				5	0.2368	0.232	0.0673			5	0.1083	0.1071	0.0311			5	0.1626	0.1523	0.0199			5	0.0625	0.0459	0.0091
7	0.1545	0.1037	0.1245	0.032				7	0.2456	0.1949	0.0511			7	0.1627	0.1961	0.0567			7	0.1771	0.1671	0.0482			7	0.0545	0.0459	0.0209
8	0.0937	0.0559	0.125	0.0597				8	0.1335	0.1601	0.0389			8	0.0947	0.0946	0.0363			8	0.1833	0.1512	0.0531			8	0.1001	0.0623	0.0096
9	0.0675	0.027	0.1059	0.0418				9	0.1265	0.1082	0.041			9	0.0572	0.043	0.0385			9	0.1744	0.1534	0.0345			9	0.0721	0.0415	0.0092
11	0.3515	0.0849	0.1738	0.0859				11	0.5409	0.5576	0.0303			11	0.154	0.1275	0.025			11	0.2421	0.2587	0.0207			11	0.1514	0.0811	0.0108
