# Supplementary material for: Rate dependent neural responses of interaural-time-difference cues in fine-structure and envelope
Source: PeerJ journal article supplement (doi:10.7717/peerj.17104), 2024-04-24
Supplement: SuppMat.pdf [file SuppMat.pdf]

# Supplementary Materials

Hongmei Hu<sup>1,2,3\*</sup>, Stephan D. Ewert<sup>2,3</sup>, Birger Kollmeier<sup>2,3</sup>, Deborah Vickers<sup>1</sup>

<sup>1</sup>SOUND Lab, Cambridge Hearing Group, Department of Clinical Neuroscience, Cambridge University, Cambridge, UK

<sup>2</sup>Department of Medical Physics and Acoustics, University of Oldenburg, Oldenburg, Germany

<sup>3</sup>Cluster of Excellence "Hearing4all", University of Oldenburg, Oldenburg, Germany

Corresponding Author:

Hongmei Hu

Küpkersweg 74, 26129, Oldenburg, Germany

Email address: hh594@cam.ac.uk, hongmei.hu@uol.de

## Materials & Methods

### *Test procedures*

#### *Psychoacoustic pretest-experiments*

Twelve NH participants (S1 - S12: 6 males and 6 females aged 21- 42 years old, with a mean age of 27.2 years) took part in the psychoacoustic experiment. In the psychoacoustic experiments, the stimuli were generated digitally using a personal computer running MATLAB (The Mathworks, Natick, MA, USA), then converted to analog form using a Fireface UC sound card (RME Audio, Haimhausen, Germany) with 24-bit resolution and a sampling rate of 48 kHz. Then the stimuli were presented to the participants through Sennheiser HD580 headphones at 70 dB sound pressure level (SPL). The participants were seated in a double-walled soundproof booth and responded by clicking the virtual buttons displayed on a monitor.

Three lateralization experiments (5-7 minutes/experiment) were performed to determine the upper frequency limit of left/right discrimination abilities. The experiments used a two-up, one-down, two-alternative forced-choice procedure (2-AFC) to estimate the 71%-correct threshold on the psychometric function (Levitt, 1971). On each trial, two consecutive intervals were presented, separated by 500 ms. Each interval contained four consecutive 400-ms tones or filtered clicks, with 20-ms raised cosine rise/fall ramps, separated by 100 ms. One interval was randomly selected as the standard and had an ITD of the carrier ( $ITD_{FS}$ ) or ITD of the envelope ( $ITD_{ENV}$ ) of 0. The other interval, the target, had the same first and third tones as the standard, but the second and fourth tones had a non-zero ITD of the same magnitude as each other. During all three experiments, participants were asked to identify which of the two intervals contained a sequence that appeared to change within the head.

Experiment 1 was conducted to determine the upper limit of the carrier frequency ( $f_{uplim_c}$ ) for fine structure ITD sensitivity by applying an IPD of  $\pi/2$  to the carrier frequency. The experiment utilized SAM tones with a fixed modulation frequency ( $f_m$ ) of 40 Hz and an adaptive carrier

41 frequency ( $f_c$ ) ranging from 100 Hz to 4000 Hz. The carrier frequency was adjusted using  
 42 adaptation factors of 1.4, 1.2, and 1.1, starting at 1000 Hz. Before the formal experiment, a brief  
 43 training task was provided to familiarize the participants with the procedures. After eight  
 44 reversals, the formal test was terminated and the threshold was calculated as the geometric  
 45 mean of the last six reversal values. This procedure was adapted from the binaural TFS  
 46 sensitivity test (TFS-AF) (Füllgrabe et al., 2017; Füllgrabe and Moore, 2017).  
 47 Experiment 2 was conducted to determine the upper limit of the modulation rate ( $f_{uplim_m}$ ) for  
 48 envelope ITD sensitivity, with a fixed ITD of 500  $\mu$ s (dichotic) or 0 (diotic) applied to the  
 49 envelope. The  $f_c$  was fixed at 4000 Hz, while the  $f_m$  was adaptive. Experiment 3 was performed  
 50 to determine the upper limit of the pulse rate ( $f_{uplim_pps}$ ) for interaural pulse time difference  
 51 (IPTD) sensitivity, using an ITD of 500  $\mu$ s applied to pulses and adjusting the pulse rate. Both  
 52 experiments were similar to experiment 1, except that in experiments 2 and 3, the start  $f_m$  or  
 53 pulse rate was 100 Hz or 100 pps, with a minimum and maximum of 10 Hz or pps and 1500 Hz  
 54 or pps, respectively. The adaptation factors were 80, 40, and 20. To accommodate individual  
 55 differences, an upper limit for the adaptive  $f_m$  was not set. This may have resulted in some  
 56 participants perceiving lower sidebands of the modulation as audible for higher modulation rates  
 57 (e.g., above  $\sim$ 350 Hz) (Kohlrausch et al., 2000), transforming the ITD change detection task into  
 58 a disparity detection task not only based on envelope ITD cues. The decision not to set an  
 59 upper limit was made to consider the possibility that participants may use other cues, which  
 60 could also trigger ACC responses.

## 61 *Stimuli*

### 62 *SAM tones*

63 In both experiments 1 and 2, SAM tones were generated digitally according to equation (1)  
 64 (Bernstein and Trahiotis, 2012; Hu et al., 2022).

$$s(t) = a \sin(2\pi f_c t)(1 - \cos 2\pi f_m t) \quad (1)$$

65 Figure 3A, column 1, shows an example of a stimulus used in the psychoacoustic experiment 1  
 66 (SAM tones  $ITD_{FS}$ ,  $f_c = 1000$  Hz and  $f_m = 40$  Hz). In this example, the first interval is the target  
 67 (row 2), and the second interval is the standard (row 3). Both the psychoacoustic and EEG  
 68 experiments employed IPD of 0 or  $\pi/2$ . EEG experiment 1 tested four carrier frequencies,  $f_c =$   
 69 [400, 800, 1200, 1600] Hz. Figure 3B, column 1, shows an example of a stimulus used in EEG  
 70 experiment 1 (SAM tones  $ITD_{FS}$ ,  $f_c = 400$  Hz and  $f_m = 40$  Hz), where each presentation lasted 8  
 71 seconds (s). The sequence included 2 s of the diotic stimulus (IPD = 0 in time window T1),  
 72 followed by 2 s of the dichotic stimulus (IPD =  $\pi/2$  in time window T2; T1 $\rightarrow$ T2 referred to as  
 73 outward switching), then 2 s of the standard stimulus (IPD = 0 in time window T3; T2 $\rightarrow$ T3  
 74 referred to as inward switching), and 2 s of silence (in time window T4).

75 The stimuli used in the second psychoacoustic experiment (not shown in Figure 3A) were also  
 76 SAM tones, but the ITD was applied to the envelope instead of the carrier. In EEG experiment  
 77 2, four modulation frequencies were tested  $f_m = [40, 80, 160, 320]$  Hz. Figure 3B, column 2  
 78 shows an example of a stimulus used in this experiment (SAM tones  $ITD_{ENV}$ ,  $f_c = 4000$  Hz and  
 79  $f_m = 40$  Hz). Like in EEG experiment 1, it consisted of 2 s of the diotic stimulus ( $ITD_{ENV} = 0$  in  
 80 the time window T1), followed by 2 s of the dichotic stimulus ( $ITD_{ENV} = 500$   $\mu$ s in the time

81 window T2; with an outward switching T1→T2), then again 2 s of the standard stimulus  
82 (ITD<sub>ENV</sub> = 0 in the time window T3; with an inward switching T2→T3), and 2 s of silence (in the  
83 time window T4). As Ross (2018) showed no detectable ACCs in most of their participants for  
84 the 4000 Hz SAM, the ACCs in experiment 2 might be smaller than in experiment 1 or absent.

85 Note that, as in (Kohlrausch et al., 2000), no precautions were taken to mask possible distortion  
86 products in both psychoacoustic and the EEG experiment 2.

### 87 *Filtered clicks*

88 In experiment 3, filtered clicks generated as in (Hu et al., 2017; Hu et al., 2022) were used to  
89 simulate the signal delivered to CI users. The pulse train was band-limited to 3-5 kHz with a  
90 center frequency of  $f_c = 4$  kHz. These band-limited pulse trains  $p(t)$  were then sinusoidally  
91 amplitude-modulated using formula (2).

$$92 \quad s(t) = p(t) * [1 - \cos(2\pi * f_m * t)] \quad (2)$$

93 The  $f_m$  in the psychoacoustic was 2.5 Hz (reciprocal of the duration of consecutive filtered  
94 clicks, i.e. 1/0.4s), while it was 10 Hz in EEG experiments. This type of SAM ensures that stimuli  
95 start at the trough of the modulation.

96 Figure 3A (column 2) and B (column 3) show an example of the stimuli used in the  
97 psychoacoustic (filtered clicks IPTD, pulse rate = 160 pps and  $f_m = 2.5$  Hz, IPTD = 0 or IPTD =  
98 500  $\mu$ s) and EEG experiments (filtered clicks IPTD, pulse rate = 160 pps and  $f_m = 10$  Hz, IPTD =  
99 0 or IPTD = 500  $\mu$ s), respectively. In the EEG experiment, four fixed pulse rates of [40, 80, 160,  
100 320] pps were used. The duration of each presentation is 6 s, which includes 2 s of the diotic  
101 stimulus, followed by 2 s of the dichotic stimulus (with a transition from T1→T2, referred as  
102 outward switching), and 2 s of silence (in time window T4, with a T2→T3 inward switching).

103 In both the psychoacoustics and EEG experiment 3, a low-pass noise, uncorrelated between  
104 the ears, was added to the filtered clicks to conceal potential distortion products. The low-pass  
105 noise was created by generating broadband noise in the time domain, converting it to the  
106 frequency domain, and setting the power of all components above 1000 Hz to zero. The noise  
107 was then manipulated to have a flat spectrum up to 200 Hz with a decreasing spectral density of  
108 3 dB/octave above 200 Hz. It was further filtered with a 5th-order, lowpass filter with a cut-off  
109 frequency of 1000 Hz (Hu et al., 2017), and gated with 50-ms raised cosine ramps. The test  
110 stimulus was centered within the noise presentation, which was presented at 40 dB SPL.

111 We chose 4000 Hz instead of a higher carrier frequency such as 8000 Hz for several reasons:  
112 Firstly, Previous studies have shown that the upper modulation rate is lower for stimuli centered  
113 at 8000 Hz compared to those centered at 4000 Hz (Bernstein and Trahiotis, 2013). Since only  
114 2 out of 14 participants in Ross (2018) showed significant responses at 4000 Hz, we would  
115 expect similar or even smaller responses at 8000 Hz. Secondly, as the aging population is one  
116 target group for future studies, high-frequency hearing loss may make a higher frequency less  
117 optimal. Lastly, although it is not a critical factor, 8000 Hz is less pleasant to listen to than 4000  
118 Hz.

## 119 **Results**

### 120 *Psychoacoustic pretest results*

121 Supplementary Figure 1 shows the violin plots of the  $f_{uplim_c}$ ,  $f_{uplim_m}$ , and  $f_{uplim_pps}$  from three  
 122 psychoacoustic experiments. The violin plots (Hintze and Nelson, 1998) were generated using  
 123 freely available Matlab code (<https://github.com/bastibe/Violinplot-Matlab>). The original box plot  
 124 shape is included as a grey box in the center of the violin. Supplementary Figure 1 depicts the  
 125 individual data of the 12 participants as solid blue dots that have been randomly jittered from the  
 126 center. The corresponding density curves have been constructed around each center line. If the  
 127 participant couldn't do the task, the value was set to 0.123456. Supplementary Figure 1  
 128 indicates that the upper limits vary across participants. The mean and standard deviation of  
 129  $f_{uplim_c}$  is  $1393 \pm 284$  Hz, which is in the range of previously reported values (Ross et al.,  
 130 2007a; Ross et al., 2007b; Grose and Mamo, 2010; Hopkins and Moore, 2010, 2011; Brughera  
 131 et al., 2013; Füllgrabe and Moore, 2017; Papesh et al., 2017; Füllgrabe and Moore, 2018). It  
 132 should be noted that the top-performing participant in this study exhibited a higher  $f_{uplim_c}$  than  
 133 those reported in (Klug and Dietz, 2022), possibly due to the utilization of different stimuli and  
 134 test procedures. The purpose of the pretests is to select the rate conditions for in the EEG  
 135 experiments. The exactly upper frequency limit in humans is not the focus of this study, and  
 136 more detailed discussions are beyond the scope of this paper.

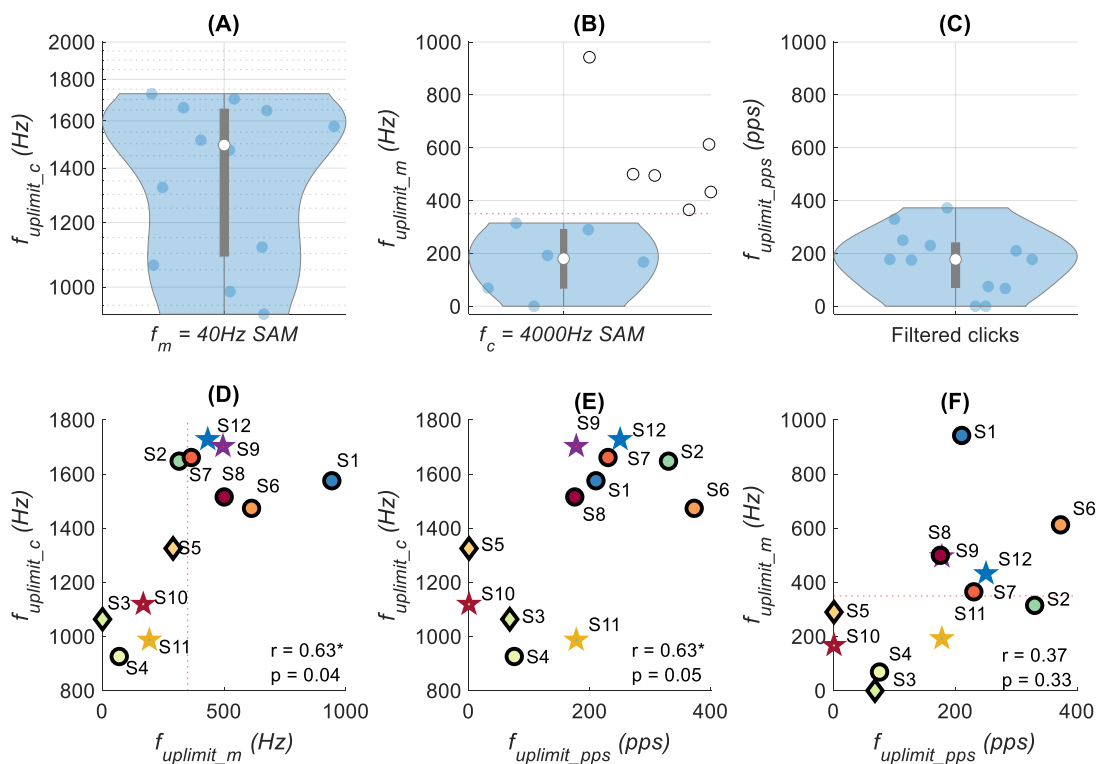

137 Supplementary Figure 1 the top panels of the figure show violin plots of the upper limit frequency  $f_c$  obtained from the psychoacoustic  
 138 experiment for each participant, represented by solid dots in each violin plot. The bottom panels display the correlation between the three  
 139 upper limit frequencies. Participants S9-S12 (represented by pentagram symbols) were unable to attend the EEG experiment, while S3 couldn't  
 140 achieve  $f_{uplim_m}$  and S5 couldn't achieve  $f_{uplim_pps}$ , represented by diamond symbols. The dotted red lines in panels B, D, and F indicate the  
 141 boundary of 350 Hz.  
 142

143 The top middle panel of Supplementary Figure 1 shows the  $f_{uplim_m}$ . Without setting a limit in  
 144 the adaptive procedure, some participants reached  $f_{uplim_m}$  above 350 Hz. Participant S1 even  
 145 reached 980 Hz. This was expected because the task may become easier again for some

146 participants if they are able to use spectrally resolve sidebands at modulation rates above a  
147 certain frequency (e.g., ~ 350 Hz, the red dotted horizontal line) (Kohlrausch et al., 2000). This  
148 phenomenon may be more prominent in the disparity detection test procedure used in this  
149 study, compared to the classical left/right discrimination tasks. To avoid misleading  
150 interpretation, the mean and standard deviation of  $f_{\text{uplim}_m}$  were calculated after excluding data  
151 from participants who couldn't complete the task (S3) and those with  $f_{\text{uplim}_m}$  above 350 Hz (6  
152 data points as indicated by the empty circles in the upper middle panel of Supplementary Figure  
153 1, which may be a result of the resolved sidebands). The resulting mean and standard deviation  
154 were  $207 \pm 99$  Hz. Some caution is necessary when interpreting the correlation between the  
155  $f_{\text{uplim}_m}$  and other experimental results. However, the same issue was not apparent for the EEG  
156 results shown in Section 3.2, because the maximum modulation frequency tested in the EEG  
157 experiment was limited to 320 Hz. The mean and standard deviation of  $f_{\text{uplim}_pps}$  for filtered  
158 clicks, after excluding S5 and S10, were  $207 \pm 97$  pps. The Pearson correlation coefficients  
159 between the three upper limits are as follows: between  $f_{\text{uplim}_c}$  and  $f_{\text{uplim}_m}$  (exclude S3),  $r =$   
160  $0.63$ ,  $p = 0.04$ ; between  $f_{\text{uplim}_c}$  and  $f_{\text{uplim}_pps}$  (excluded S5 and S10),  $r = 0.63$ ,  $p = 0.05$ ; and  
161 between  $f_{\text{uplim}_m}$  and  $f_{\text{uplim}_pps}$  (excluded S3, S5, and S10),  $r = 0.37$ ,  $p = 0.33$ .  
162 S3 and S5 were unable to perform the corresponding experiments. However, both detected  
163 changes when presented with 100 Hz SAM tones and 100 pps filtered clicks with 500  $\mu$ s ITD. It  
164 was speculated that this was mainly due to the large initial adaptive stepsize and their difficulty  
165 in focusing during the first reversal. S8 reported that he occasionally experienced mild tinnitus.  
166 Despite this, he was included in the EEG experiment as his audiometry results were within  
167 normal hearing range and his lateralization performance was above average. Regrettably,  
168 participants S9-S12 were unable to attend the EEG experiments due to reasons relating to the  
169 COVID-19 pandemic.

## 170 *Additional EEG results*

### 171 *Time domain (CAEPs)*

#### 172 ■ CAEPs of experiment 1

173 Regarding experiment 1 ( $\text{ITD}_{\text{FS}}$ , page Figure 4A and Figure 6A), the amplitude and latency of  
174 the offset responses (aqua) were relatively consistent across different carrier frequencies and  
175 the N1 latency of the offset responses was generally shorter compared to the onset and ACC  
176 responses.

177 The N1P2 amplitude was significantly affected by carrier frequency ( $f_c$ ), response type, and  
178 their interaction according to GLMrm ( $p < 0.005$ ). The mean amplitude was  
179  $7.318/6.063/5.094/4.023$   $\mu$ V for 400/800/1200/1600 Hz, respectively. There were no significant  
180 differences between 400, 800, and 1200 Hz, but the N1P2 amplitude for the 1600 Hz was  
181 significantly smaller than the other carrier frequencies. For the offset CAEPs, there were no  
182 significant differences between carrier frequencies. For most of the onset CAEPs, the  
183 differences were not significant except that the N1P2 amplitude of 1200 Hz was slightly larger  
184 than that of 1600 Hz ( $p = 0.048$ ). For ACC1 (outward) responses, the N1P2 amplitudes of 400

185 Hz and 800 Hz were significantly larger than the 1200 and 1600 Hz, but there were no  
186 significant differences between 400 and 800 Hz, and between 1200 Hz and 1600 Hz. For ACC2  
187 (inward) responses, the N1P2 amplitude of 800 Hz was significant larger than that of 1200 and  
188 1600 Hz, and the N1P2 amplitude of 400 Hz was significantly larger than that of 1600 Hz.

189 The mean N1P2 amplitudes were 8.577/4.816/4.172/4.932  $\mu\text{V}$  for onset/ACC1/ACC2/offset  
190 responses, respectively. The onset CAEPs were significantly larger than the ACC1, ACC2, and  
191 offset CAEPs. However, there were no significant differences between the three latter types.  
192 Pairwise comparisons within each  $f_c$  showed that the onset CAEPs were significantly larger than  
193 the offset CAEPs only for 400 and 1200 Hz. There were no significant differences between  
194 ACC1 and ACC2 for all carrier frequencies. Significant correlations were observed between the  
195 onset N1P2 amplitudes of most carrier frequencies, except for 400 vs 1200 Hz, and 400 vs  
196 1600 Hz.

197 The mean N1 latency was 114/132/137/95 ms for onset/ACC1/ACC2/offset, respectively. The  
198 GLMrm analysis showed a significant effect of response type ( $p < 0.001$ ), but no significant effect  
199 of  $f_c$  and their interaction. Pairwise comparisons showed significant differences between most  
200 response types ( $p < 0.01$ ), except between ACC1 and ACC2. The N1 latency of ACC responses  
201 was significantly larger than the onset response, while the offset response had the shortest  
202 latency and was significantly smaller than the other response types.

203 In summary, the results from experiment 1 were generally consistent with Ross et al. (2007b).  
204 For example, the mean P1, N1, and P2 amplitudes of ACC were smaller than those of the onset  
205 response: P1, 1.684/1.405/1.005/0.248  $\mu\text{V}$ ; N1, 3.324/-1.299/-1.019/-2.146  $\mu\text{V}$ ; P2,  
206 3.946/2.128/1.862/2.379  $\mu\text{V}$  for onset/acc1/acc2/offset. The ACC latencies were delayed  
207 compared with the corresponding onset and offset ones: P1, 42/46/57/27 ms; N1,  
208 114/132/137/95 ms; P2, 211/227/240/213 ms for the onset/ACC1/ACC2/offset. The mean  
209 latencies of both P1 and N1 were in the same range but slightly smaller than Ross et al.  
210 (2007a). The latencies of ITD<sub>FS</sub> change evoked ACC1 and ACC2 that were longer than the  
211 onset, and the differences were smaller than Ross et al. (2007a). Consistent with (Ross, 2018),  
212 there was a tendency for larger responses to outward IPD changes (ACC1) than inward  
213 changes (ACC2) for the lower carrier frequencies, however, it was not significant here ( $p > 0.5$ ).

214

#### 215 ■ CAEPs of experiment 2

216 In experiment 2 (ITD<sub>ENV</sub>), as demonstrated in paper Figure 4B and Figure 6B, similar to  
217 experiment 1, there were clear onset and offset responses in all four test conditions. The onset  
218 N1P2 amplitude was comparatively larger than the offset responses, but the difference between  
219 the onset and offset CAEPs was smaller compared to those shown in paper Figure 4A and  
220 Figure 6A. Consistent with the findings of Ross (2018), the N1P2 amplitudes of both onset and  
221 offset CAEPs were larger than the ACC responses, due to the tiny (close to the noise floor) or  
222 absence of ACC responses.

223 Regarding the N1P2 amplitude in experiment 2, a GLMrm analysis revealed significant effects  
224 of  $f_m$ , response type, and their interaction. The mean amplitude was 4.249/4.228/5.258/5.665  
225  $\mu\text{V}$  for  $f_m$  of 40/80/160/320 Hz, respectively. A significant difference between  $f_m$  was only  
226 observed for 80 Hz vs 160 Hz. Consistent with this, pairwise comparisons within each response  
227 type only showed a just significant smaller onset N1P2 amplitude in 80 Hz condition compared

228 to the 160 Hz condition ( $p = 0.048$ ). The mean amplitude was 8.547/2.543/1.853/6.458  $\mu\text{V}$  for  
229 onset/ACC1/ACC2/offset, respectively. Both onset and offset CAEPs were larger than the ACC  
230 responses. There were no significant differences between ACC1 and ACC2, and between onset  
231 and offset. Within each  $f_m$ , pairwise comparisons also showed no significant difference between  
232 onset and offset CAEPs, and between ACC1 and ACC2 responses (near noise floor). The onset  
233 and offset CAEPs were significantly larger than ACC responses, except for the comparison  
234 between ACC1 and offset for  $f_m = 80$  Hz, and between ACC1 and offset, and ACC2 and offset  
235 for  $f_m = 160$  Hz. Significant correlations were observed among modulation frequencies for all  
236 onset N1P2 amplitudes and for most offset N1P2 amplitudes, except for 320 vs 40, and 320 vs  
237 160 Hz. The offset CAEPs were more correlated with the ACC responses than with the onset  
238 responses, mainly due to their small amplitudes.

239 For N1 latency, the GLMrm analysis showed no significant effect of either  $f_m$  or response type.  
240 The mean latency was 107/109/107/101 ms for onset/ACC1/ACC2/offset, and 107/105/104/109  
241 ms for 40/80/160/320 Hz.

242

### 243 ■ CAEPs of experiment 3

244 Regarding the filtered clicks (paper Figure 4C and Figure 6C), there were no ACC2 responses  
245 (for inward IPTD changes) recorded in experiment 3. Overall, the N1P2 amplitude of both onset  
246 and offset responses increased with increasing pulse rates. Similarly to experiment 2, the ACC1  
247 responses were either small (near the noise floor) or absent.

248 For N1P2 amplitude, GLMrm showed a significant effect of pulse rate, response type, and their  
249 interactions ( $p < 0.01$ ). The mean amplitude was 2.31/3.43/5.36/5.35  $\mu\text{V}$  for 40/80/160/320 pps,  
250 respectively. There were no significant differences between pulse rates of 40 and 80 pps, and  
251 between 160 and 320 pps. Within each response type, pairwise comparisons showed no  
252 significant differences between pulse rates for both ACC1 and offset responses. For the onset  
253 CAEPs, there were significant differences between most pulse rates ( $p < 0.01$ ), except for  
254 conditions of 40 vs 80 pps, and 160 vs 320 pps. The mean amplitude was 5.48/2.52/4.34  $\mu\text{V}$  for  
255 onset/ACC1/offset, and only the difference between onset and ACC1 responses was significant.  
256 Within each pulse rate, pairwise comparisons showed no significant differences between  
257 response types for most pulse rates, except that for 160 pps and 320 pps, there was a  
258 significantly larger onset N1P2 amplitude than the offset one ( $p = 0.009$ , and  $p = 0.014$ ). There  
259 were no correlations between N1P2 amplitudes of different pulse rates for both onset and offset  
260 responses.

261 For N1 latency, GLMrm revealed a significant effect of pulse rate, but not of response types or  
262 their interactions. The mean latency was 141/134/119/114 ms for 40/80/160/320 pps,  
263 respectively. The N1 latency was significantly shorter for 320 pps compared to 40 pps and 80  
264 pps, and for 160 pps compared to 80 pps. Within each response type, pairwise comparison  
265 showed significant N1 latency differences only for 320 pps vs 40 pps, 320 pps vs 80, and 80  
266 pps vs 160 pps for the onset CAEPs, and between 40 pps and 320 pps ( $p = 0.044$ ) for ACC1.  
267 The mean latency was 131/129/120 ms for onset/ACC1/offset responses with no significant  
268 differences between them. Within each pulse rate, there were nearly no significant differences  
269 between the three response types, except that the onset N1 latency was significantly larger than  
270 the offset one ( $p = 0.011$ ) for the 80 pps.

271     ▪   Comparison CAEPs evoked with 40 Hz modulation rate stimuli

272     In experiment 3, we did not measure ACC2 data (inwards changes) for the filtered clicks, so  
273     only the onset, ACC1 (outwards changes), and offset responses of the five types of 40 Hz  
274     modulated SAM tones and the 40-pps filtered clicks were analyzed using GLMrm (with factors:  
275     stimuli type [400/800/1200/1600/4000SAM/40-pps-clicks], and response type [onset, ACC1 and  
276     offset]).

277     GLMrm showed a significant effect ( $p < 0.005$ ) of stimulus type, response type, and their  
278     interaction on the N1P2 amplitude. The mean amplitude was  
279     7.544/6.271/5.860/4.759/5.046/2.309  $\mu\text{V}$  for 400/800/1200/1600/4000SAM/40-pps-clicks,  
280     respectively. Pairwise comparison revealed significant differences between 400 Hz and 1600 Hz  
281     SAM tones, and between 40-pps filtered clicks and all four low-frequency SAM tones. Within  
282     each response type, the pairwise comparison showed that: 1) the onset response amplitude of  
283     the 40-pps filtered clicks was significantly smaller than most SAM tones except for the 800 Hz;  
284     2) the 400 and 800 Hz SAM tones evoked significant larger responses than the other three SAM  
285     tones and the 40-pps filtered clicks for ACC1 response; 3) there were no significant differences  
286     among different stimulus types for the offset responses.

287     The GLMrm analysis revealed a significant effect of stimulus type, response type, as well as  
288     their interaction on N1 latency. The mean latency was 110/112/114/120/104/141ms for  
289     400/800/1200/1600/4000SAM/40-pps-clicks. Pairwise comparison showed significant  
290     differences in latency between 1600 Hz and 4000 Hz SAM tones, and between 40-pps filtered  
291     clicks and the four low-frequency SAM tones. Further analysis within each response type  
292     showed that for onset responses, the 40-pps filtered clicks had a significantly different latency  
293     from most other stimulus types, except for the 1600 Hz SAM tones ( $p = 0.051$ ). Within each  
294     stimulus type, there were no significant differences in latency among the three response types  
295     for both 4000 Hz SAM tones and 40-pps filtered clicks.

296

297     *Time-frequency domain*

298     Supplementary Figure 2A shows the time-frequency representations or wavelet spectrograms  
299     after wavelet transformations for stimuli with 40-Hz modulation frequency or 40-pps pulse rate in  
300     the frequency range of 2-50 Hz in the linear y-scale. The wavelet spectrograms reveal that the  
301     onset, ACC1, ACC2, and offset CAEPs are primarily dominated by frequencies below 30 Hz,  
302     while the 40-Hz ASSRs are centered around 40 Hz except during the 2s-silence period. Wavelet  
303     time-frequency visualization reveals some interactions between the transient CAEPs and  
304     ASSRs. A clear reset, represented by blue gaps in the 40 Hz regions, can be seen in the  
305     ASSRs whenever the P1-N1-P2 complex is detected and pronounced. This suggests that the  
306     transient CAEPs desynchronize the steady-state activity. For example, for  $f_c$  of 400, 800, and  
307     1200 Hz, the ASSRs were suppressed or reset at approximately 0, 2, and 4 s, respectively, and  
308     the ASSRs in these time windows (T1, T2, T3) exhibit notable energy differences.



309  
310

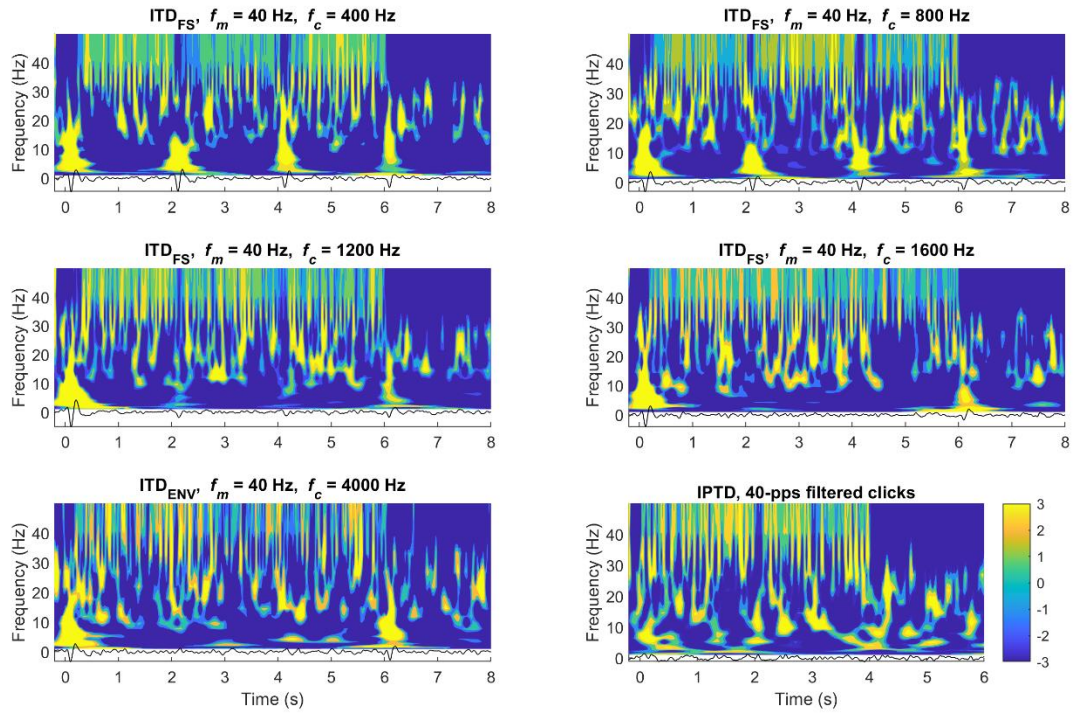

(A)

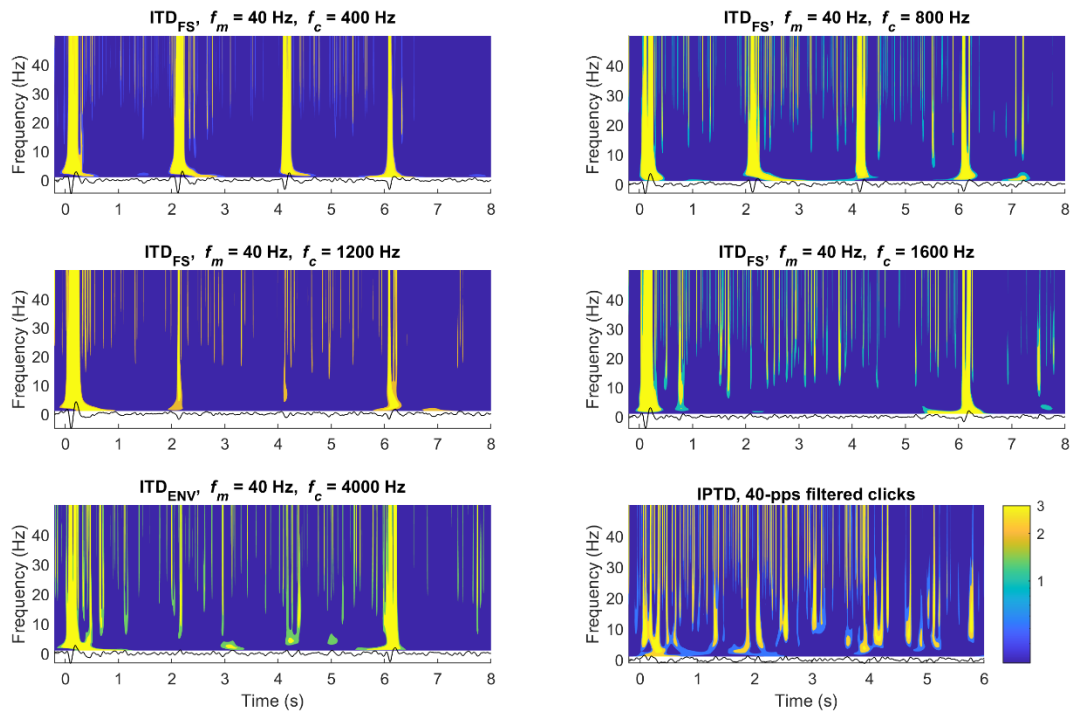

(B)

311

312

313

314

315

Supplementary Figure 2 The average response in the time-frequency domain for conditions with  $f_m = 40$  Hz or pulse rate = 40 pps. (A) the number of cycles is  $n = 6$ , and (B)  $n = 2$ , with log colorscale. The time-frequency spectrum was obtained by applying wavelet analysis on the average response shown at the bottom of each panel.

316 Both Figure 8 and Supplementary Figure 2A have  $n = 6$  cycles, which determines the temporal  
317 and spectral precision. An increase in  $n$  leads to decreased temporal precision but increased  
318 spectral precision, and vice versa. To prioritize temporal precision, Supplementary Figure 2B  
319 presents the same results as Supplementary Figure 2A but with  $n = 2$  cycles. The color bar  
320 uses a log color scale for improved visualization. Compared to the ACC evoked by low-  
321 frequency ITDfs, Supplementary Figure 2B shows that the change responses evoked by the  
322 high-frequency ITDenv are much smaller and more similar to the surrounding brain activities,  
323 making it more challenging to determine the presence of ACC response.

#### 324 *Frequency domain (ASSRs)*

325 A comparison between the 40-Hz ASSRs shown in Supplementary Figure 3 (A, the top-left  
326 panel of B and C, with the two parallel red dashed lines representing 30 and 50 Hz,  
327 respectively) and Supplementary Figure 2 reveals slight differences in different time durations.  
328 To examine possible differences in the steady state responses before and after interruption by  
329 the stimulus onset, ITD changes, and offset, the ASSRs in different time windows were  
330 analyzed.

331 Supplementary Figure 3 shows the overall average ASSRs across participants for different  
332 analysis windows (panels 1-5: T1, T2, T3, T4, T1234, or T124). The colored curves in the cream  
333 area are the average ASSR from each individual. The red, blue, black, and pink curves  
334 represent the group average ASSR across participants for various test conditions: (A)  $f_c = [400,$   
335  $800, 1200, 1600]$  Hz; (B)  $f_m = [40, 80, 160, 320]$  Hz; (C) pulse rate =  $[40, 80, 160, 320]$  pps. The  
336 numbers with corresponding colors indicate the ASSR values at the modulation frequency within  
337 one of the analysis windows. The bottom right panel shows violin plots of the ASSR amplitude  
338 at the modulation frequency, within 8s (T1234) for the SAM tones or 6s (T124) for the filtered  
339 clicks.

340 In general, the 40-Hz ASSR decreased with increasing carrier frequency for the SAM tones.  
341 There was no ASSR in T4 (silence), the values shown are the noise floor around the modulation  
342 frequency, as expected.

343 Regarding experiment 1 (Supplementary Figure 3A), the overall mean 40-Hz ASSR amplitudes  
344 were 0.206/0.215/0.209/0.035/0.153 $\mu$ V within T1/T2/T3/T4/T1234, and 0.187/0.173/0.152/0.142  
345  $\mu$ V for 400/800/1200/1600 Hz. As found by Ross (2018), the amplitude of the 40-Hz ASSR  
346 within T1234 declined gradually with increasing carrier frequency. GLMrm (factors: analysis  
347 window, T1, T2, T3, T4, T1234;  $f_c$ ) showed significant effect of  $f_c$  and analysis window, as well  
348 as their interaction. However, pairwise comparison showed no significant differences between  
349 different carrier frequencies. Pairwise comparison revealed significant differences between T4  
350 (silence) and the other analysis windows (T1, T2, T3, T1234), as well as between T1234 and  
351 the other windows (T1, T2, T3, T4). Within each carrier frequency, the 40-Hz ASSR amplitudes  
352 were not significantly different among T1, T1, and T3.

353 The 40-Hz ASSR of different  $f_c$  SAM tones were all correlated, but there was no correlation  
354 between the  $f_c$  limit and either N1P2 or 40-Hz ASSR amplitude.

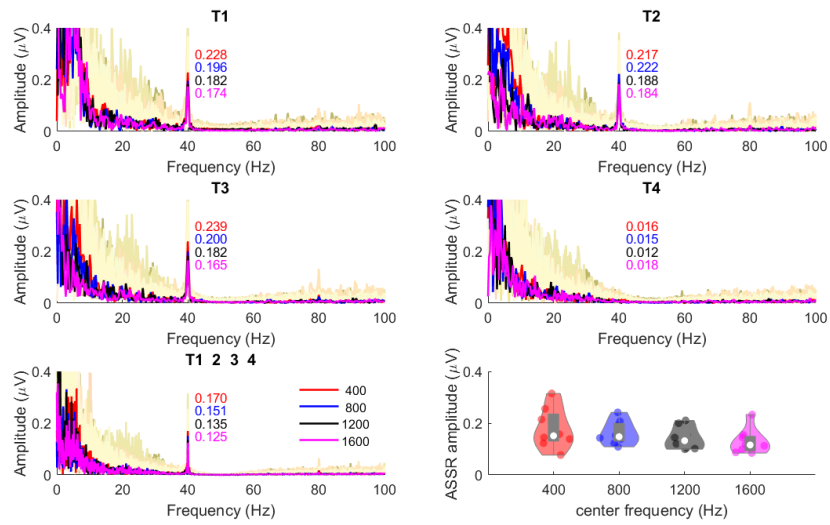

355

(A)

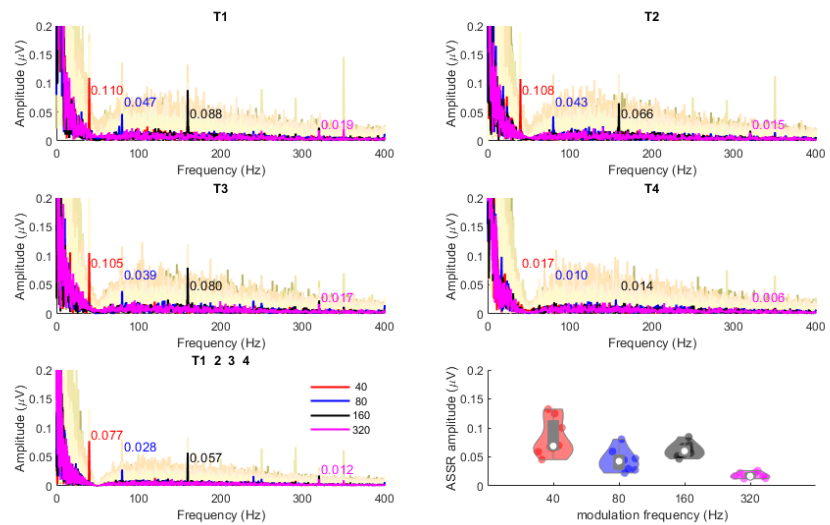

356

(B)

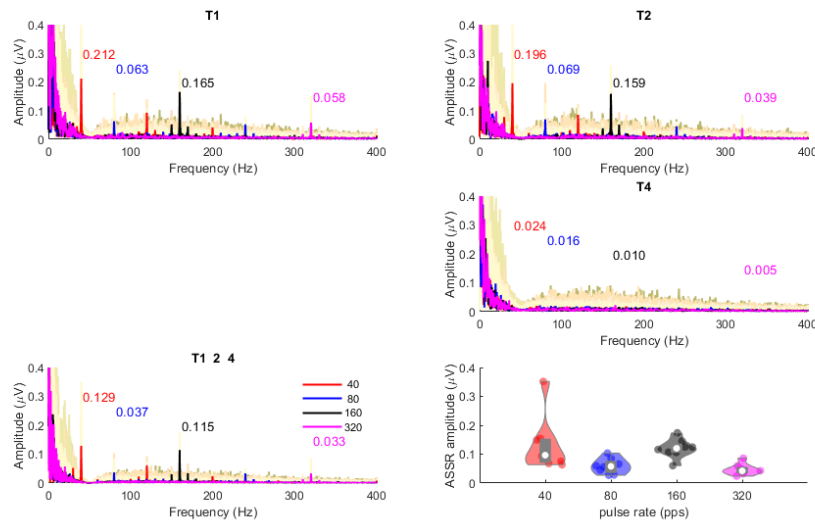

(C)

357

358 Supplementary Figure 3 The individual and group average ASSRs in the frequency domain. The red, blue, black, and pink spectrums are the  
 359 overall average ASSR across participants for different test conditions: (A)  $f_c = [400, 800, 1200, 1600]$  Hz;. (B)  $f_m = [40, 80, 160, 320]$  Hz;. (C) pulse  
 360 rate =  $[40, 80, 160, 320]$  pps. All the other colored curves in the background are the average ASSR from each individual. The first five panels are  
 361 the ASSRs in different analysis time windows (T1, T2, T3, T4, T1234, or T124). The numbers shown in different colors are the 40-Hz ASSR values  
 362 within the corresponding time window for each carrier frequency. The bottom right panel shows the violin plots of the ASSR amplitude for each  
 363 carrier frequency, with an analysis window of 8s (T1234) for SAM tones or 6s (T124) for the filtered clicks. The solid dots in each violin plot are  
 364 individual ASSRs at the corresponding  $f_m$  or pulse rate of each participant.

365 Supplementary Figure 3B and C show the ASSRs at modulation rates of 40, 80, 160, and 320  
 366 Hz in various analysis time windows. The values in different colors indicate the corresponding  
 367 ASSR values at different modulation rates. In general, the ASSRs of high carrier frequency  
 368 stimuli are smaller than those of low carrier frequency ( $\leq 1600$ ) SAM tones, and the ASSRs of  
 369 filtered clicks are larger than those of high carrier frequency SAM tones. Among both types of  
 370 high-frequency stimuli, the order is 40-Hz ASSR > 160-Hz ASSR > 80-Hz ASSR > 320-Hz  
 371 ASSR. The larger 40-Hz ASSR evoked by the filtered clicks is mainly due to better phase  
 372 locking to the envelope, as reported by Hu et al (2022).

373 Regarding experiment 2 (Supplementary Figure 3B), the overall mean ASSR amplitudes were  
 374 0.079/0.071/0.072/0.033/0.052  $\mu\text{V}$  within T1/T2/T3/T4/T1234, and 0.093/0.058/0.071/0.022  $\mu\text{V}$   
 375 for 40/80/160/320 Hz. GLMrm (factors: analysis window, T1, T2, T3, T4, T1234;  $f_m$ ) showed  
 376 significant effect of  $f_m$  and analysis window, as well as their interaction. Pairwise comparisons  
 377 showed no significant differences for  $f_m$  40 vs 80, 40 vs 160, 80 vs 160 Hz. Similar to  
 378 experiment 1, pairwise comparisons showed significant differences between T4 (silence) and  
 379 the other analysis windows (T1, T2, T3, T1234) as well as between T1234 and the other four  
 380 analysis windows, both across modulation frequencies and within individual ones. Pairwise  
 381 comparisons for each analysis window showed that within T1, there were significant differences  
 382 between most pulse rates except for 40 vs 160, 80 vs 160 pps; for T2, T3, T4, and T1234, the  
 383 ASSR of 320 Hz was significantly smaller (T2,  $p < 0.01$ ; T3, T4, and T1234,  $p < 0.05$ ) than the  
 384 other three modulation frequencies. There was no correlation between the  $f_m$  limit and the  
 385 N1P2 amplitude or the ASSR amplitude. The onset responses of different modulation  
 386 frequencies were all correlated with each other, and the offset N1P2 amplitudes of 40, 80, and  
 387 160 Hz were correlated with each other, but not with that of 320 Hz.

388 For experiment 3 (Supplementary Figure 3C), the mean ASSR amplitudes were  
389 0.143/0.131/0.032/0.089  $\mu\text{V}$  in T1/T2/T4/T124, and 0.148/0.075/0.123/0.048  $\mu\text{V}$  for  
390 40/80/160/320 pps. GLMrm (factors: analysis window, T1, T2, T4, T124;  $f_m$ ) showed significant  
391 effect of  $f_m$  and analysis window, as well as their interaction. Pairwise comparison only showed  
392 significant ASSR amplitude differences for 160 vs 80, and 160 vs 320 pps. Unlike experiments 1  
393 and 2, the pairwise comparison showed significant differences among all the analysis windows.  
394 Specifically, the 160 pps condition evoked a significantly larger ASSR compared to the 80 and  
395 320 pps conditions within both T1 and T124, as well as the 320 pps condition within T2.  
396 Additionally, the noise floor in T4 (silence) was significantly smaller for 320 pps compared to the  
397 other three pulse rates. No correlation was found between the pulse rate upper limit and the  
398 N1P2 amplitude or the ASSR amplitude. However, the ASSR amplitude of the 40 pps condition  
399 was correlated with the 160 pps condition.
